# Supplementary material for: Enhanced performance of PTB7-Th:PCBM based active layers in ternary organic solar cells
Source: Royal Society of Chemistry journal article supplement (doi:10.1039/c8ra08919a), 2019-01-01
Supplement: c8ra08919a1.pdf [file c8ra08919a1.pdf]

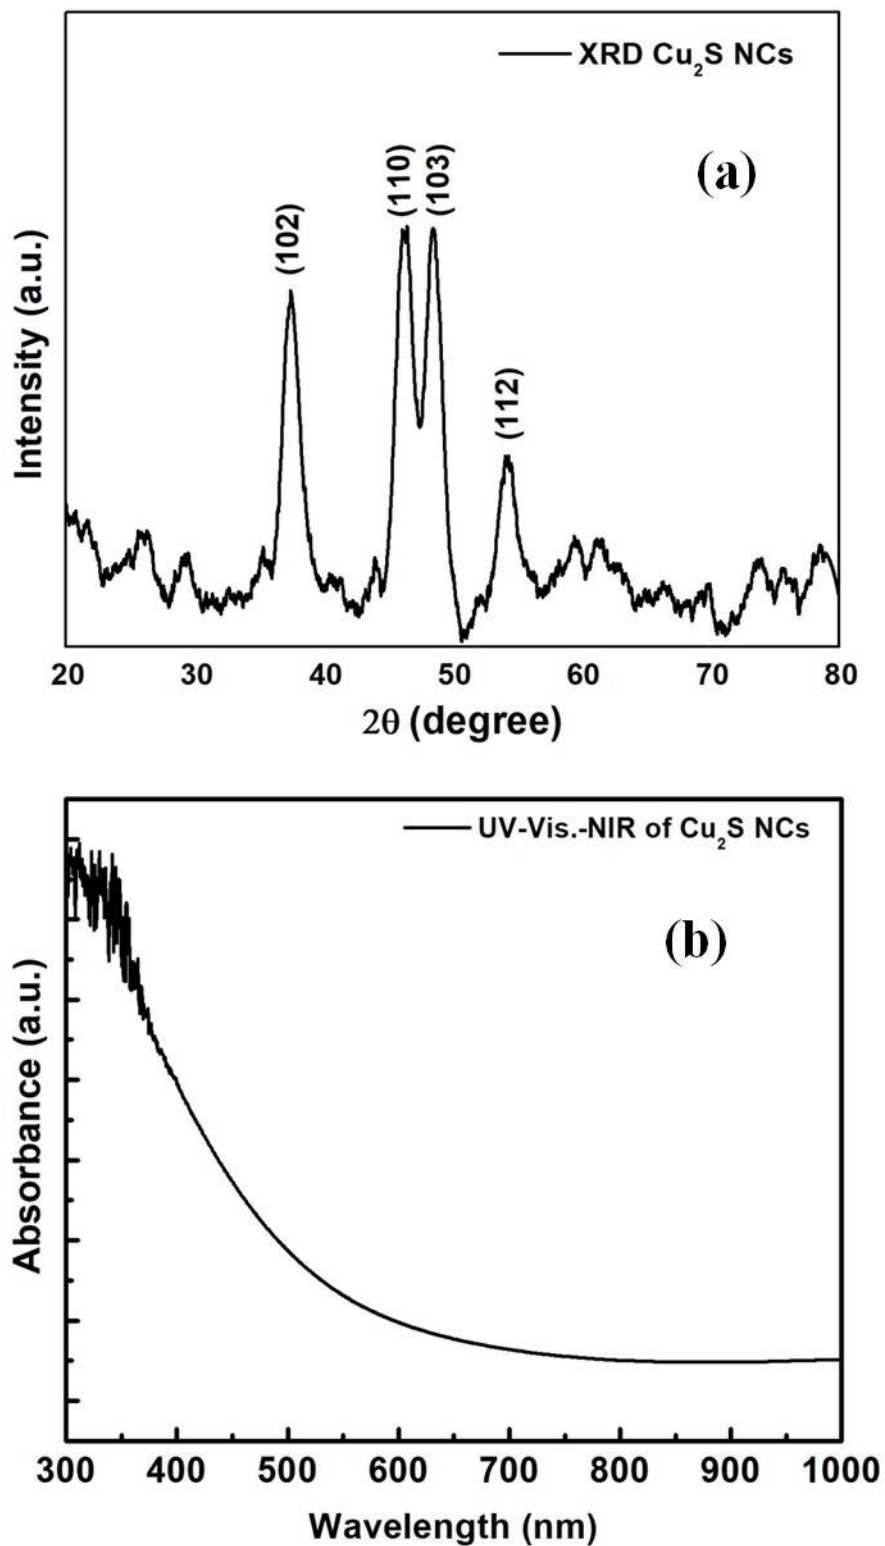

Fig. S1 (a) XRD pattern of as synthesized Cu<sub>2</sub>S NCs (d) UV- Vis. NIR absorption spectra of as synthesized Cu<sub>2</sub>S NCs.

The crystalline quality has also been confirmed by X-ray diffraction (Cu  $K_{\alpha}$  radiation,  $\lambda = 1.5418$  A°) of Cu<sub>2</sub>S NCs, as shown in the Fig. S1 (a) with  $2\theta$  scan between 20° to 80°. Presence of all the prominent peaks and their corresponding  $2\theta$  values are in close agreement with the previous studies and replicates with the JCPDS file no.00-026-1116. This confirms the hexagonal structure of as-synthesized Cu<sub>2</sub>S NCs. Absence of additional peaks besides the peaks of Cu<sub>2</sub>S NCs confirms that the adopted protocol yields the pure phase of Cu<sub>2</sub>S NCs which is essential for the device fabrication. The advantage of using Cu<sub>2</sub>S nanocrystals is having low band-gap as shown in Fig. S1 (b) in absorbance spectra UV-Vis.-NIR, where wide absorption spectrum can be seen up of wavelengths below 1000 nm and therefore capable of harnessing the major part of the solar spectrum.
